# Supplementary material
Source: Royal Society of Chemistry journal article supplement (doi:10.1039/d6lc00382f)
Supplement: d6lc00382f2.pdf [file d6lc00382f2.pdf]

Electronic Supplementary Information for

# **Adeno-associated viral vector purification using a centrifugal microfluidic system: Towards workflow automation for low-volume sample processing**

Matthias Geissler,<sup>a,b,\*</sup> Lidija Malic,<sup>a,b</sup> Liviu Clime,<sup>a,b</sup> Dillon Da Fonte,<sup>a,b</sup> Christina  
Nassif,<sup>a,b</sup> Mojra Janta-Polczynski,<sup>a,b</sup> Caroline Miville-Godin,<sup>a,b</sup> Daniel  
Brassard,<sup>a,b</sup> Nasha Nassoury,<sup>c</sup> Richard Gingras,<sup>c</sup> Nazila Nazemi-Moghaddam,<sup>c</sup>  
Parminder Singh Chahal,<sup>c</sup> Rénaud Gilbert,<sup>c</sup> and Teodor Veres<sup>a,b</sup>

<sup>a</sup> *Medical Devices Research Centre, National Research Council of Canada, 75 de Mortagne  
Boulevard, Boucherville, QC, J4B 6Y4, Canada; E-mail: matthias.geissler@cnrc-nrc.gc.ca*

<sup>b</sup> *Centre for Research and Applications in Fluidic Technologies, Department of Mechanical and  
Industrial Engineering, 5 King's College Road, Toronto, ON, M5S 3G8, Canada*

<sup>c</sup> *Human Health Therapeutics Research Centre, National Research Council of Canada, 6100  
Royalmount Avenue, Montreal, QC, H4P 2R2, Canada*

**Table S1** Buffer solutions used in the AAV purification process

| Buffer | Composition                                    | pH  | Supplier                                |
|--------|------------------------------------------------|-----|-----------------------------------------|
| EqB    | 20 mM Tris, 150 mM trisodium citrate dihydrate | 7.2 | BioShop (Burlington, ON), Sigma-Aldrich |
| EB     | 100 mM glycine                                 | 2.5 | BioShop                                 |
| NB     | 1 M Tris                                       | 8.8 | BioShop                                 |
| DB     | 20 mM Tris, 150 mM trisodium citrate dihydrate | 7.2 | BioShop, Sigma-Aldrich                  |

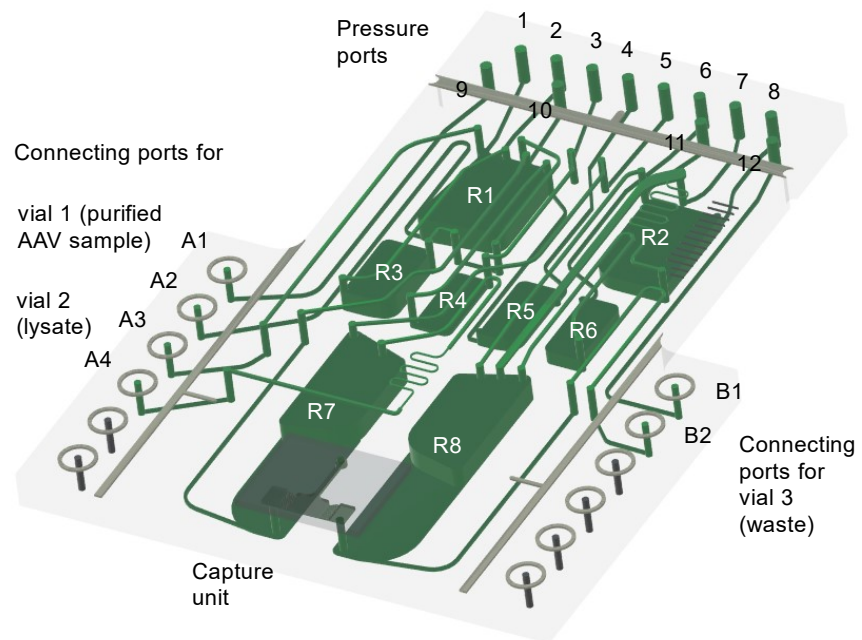

**Fig. S1** Configuration of the microfluidic circuit (3D view) implemented on the cartridge.

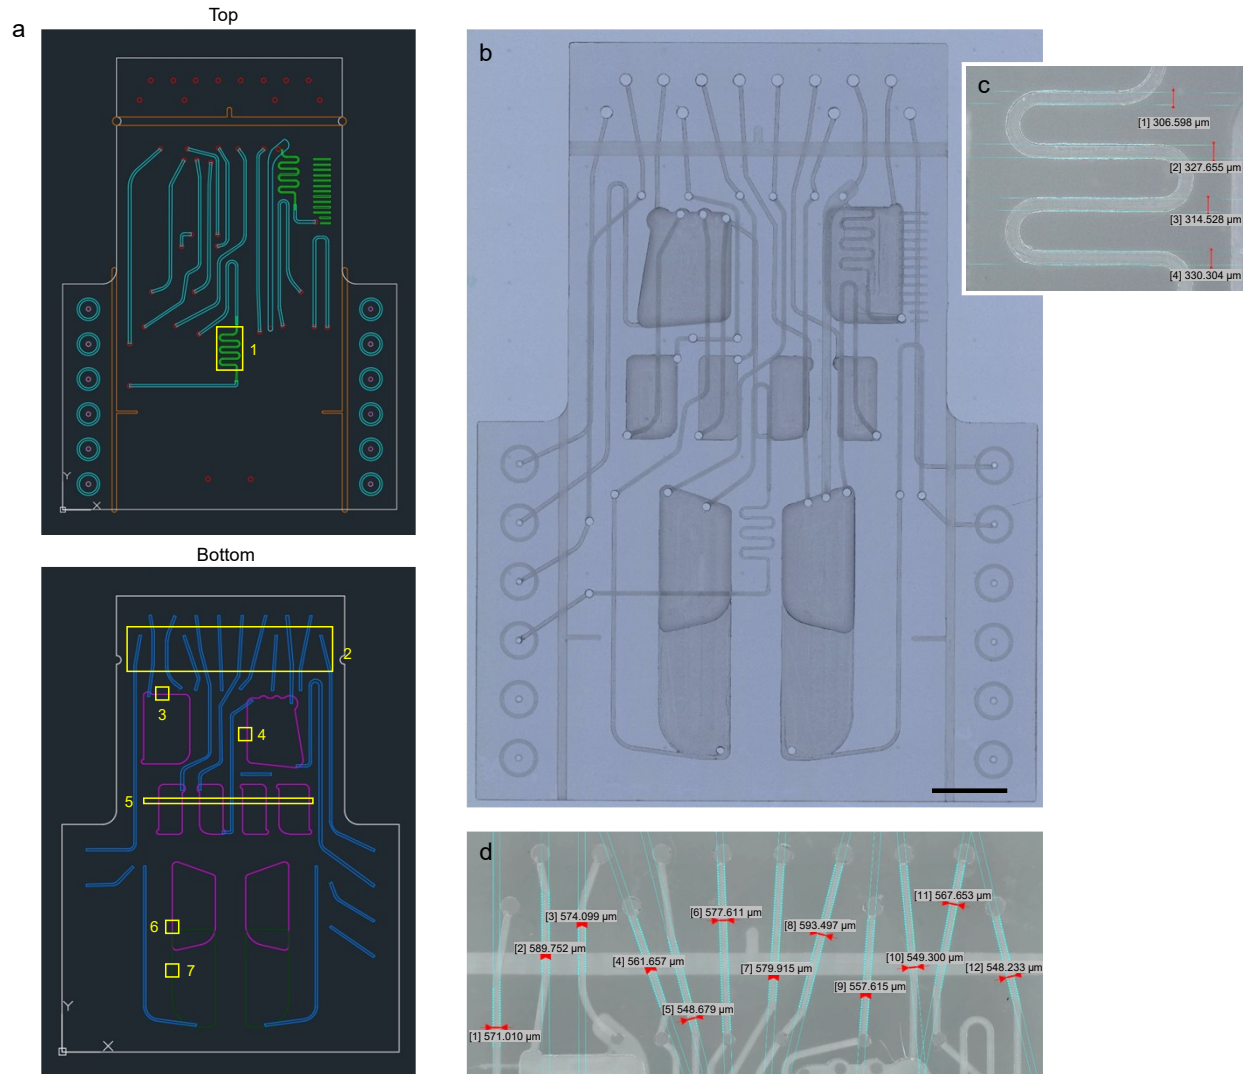

**Fig. S2** Two-level microfluidic circuit. (a) CAD file of the structures implemented on the top and bottom side of the PC part. Note, that the bottom view mirrors the microfluidic configuration seen from the top. Regions marked in yellow were used to perform metrology after CNC machining (Table S2). (b) Optical microscopy image of a machined PC part (top view). Scale bar: 1 cm. (c) Close-up view of the serpentine channel. Straight channel segments were used for width measurements. (d) View of the upper portion of the cartridge (bottom side) used to determine channel width.

**Table S2** Metrology of fluidic design elements produced by CNC machining

| Inspection zone | Unit               | Design                  |                         | Machined PC part        |                         |
|-----------------|--------------------|-------------------------|-------------------------|-------------------------|-------------------------|
|                 |                    | Width ( $\mu\text{m}$ ) | Depth ( $\mu\text{m}$ ) | Width ( $\mu\text{m}$ ) | Depth ( $\mu\text{m}$ ) |
| 1               | Serpentine channel | 260                     | 160                     | 320 <sup>a</sup>        | 263                     |
| 2               | Transfer channels  | 520                     | 300                     | 568 <sup>b</sup>        | 503                     |
| 3               | R2                 |                         | 3,000                   |                         | 3,066                   |
| 4               | R1                 |                         | 4,000                   |                         | 3,946                   |
| 5               | R3                 |                         | 3,000                   |                         | 3,031                   |
|                 | R4                 |                         | 500                     |                         | 581                     |
|                 | R5                 |                         | 2,000                   |                         | 2,082                   |
|                 | R6                 |                         | 2,000                   |                         | 2,089                   |
| 6               | R8, upper portion  |                         | 3,000                   |                         | 3,102                   |
| 7               | R8, lower portion  |                         | 300                     |                         | 344                     |

<sup>a</sup> Average of four measurements (Fig. S2c). <sup>b</sup> Average of 12 measurements (Fig. S2d).

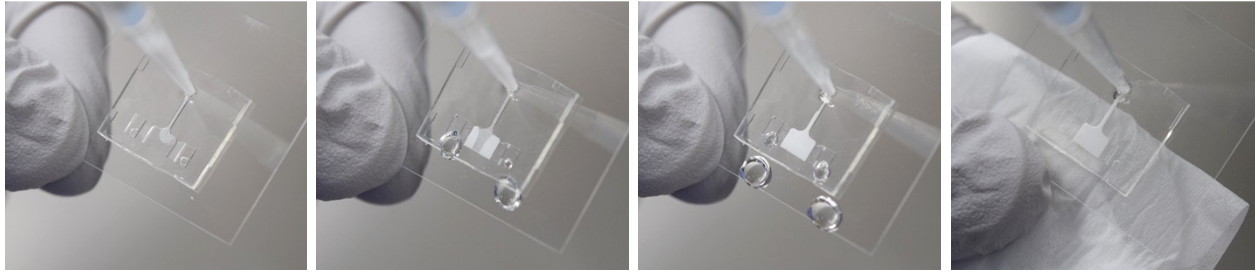

**Fig. S3** Filling of the capture unit. A diluted suspension of bead slurry is pipetted into the filling port. Beads accumulate gradually while excess NaCl solution is leaving through the constriction area implemented on the left- and right-hand side of the capture chamber. Once filling is completed, the back side of the unit is dried using laboratory wipe.

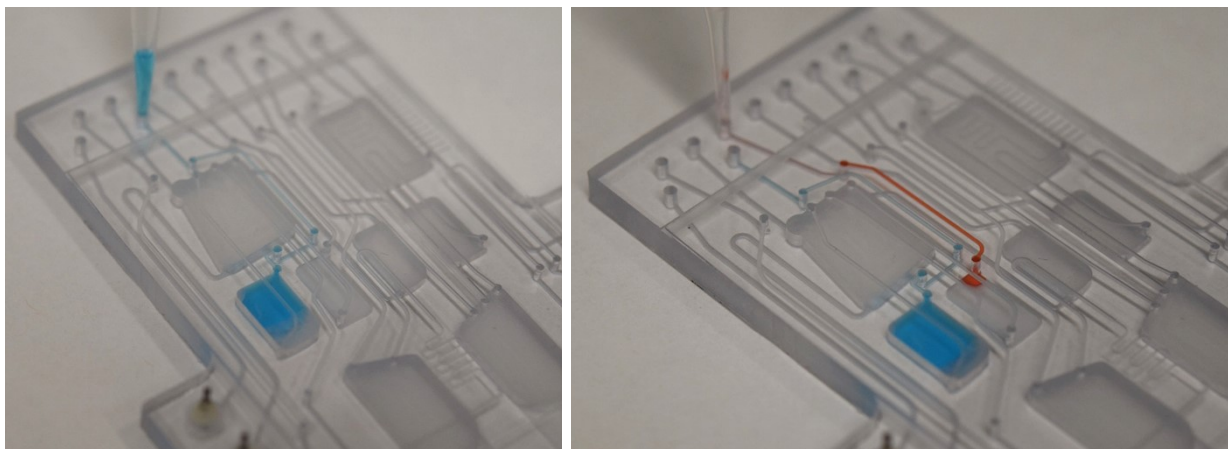

**Fig. S4** Filling of reservoirs on the microfluidic cartridge using a micropipette. Left-hand panel: 190  $\mu\text{L}$  of blue-colored solution is pushed into reservoir R3 (through pressure port #10). Right-hand panel: 10  $\mu\text{L}$  of red-colored solution is pushed into reservoir R4 (through pressure port #3).

**Table S3** Probe and primer sequences<sup>a</sup> used in the pcDNA3-EGFP qPCR assay

| Name           | Sequence (5' → 3')                         |
|----------------|--------------------------------------------|
| Forward primer | GCA CAA GCT GGA GTA CAA CTA                |
| Reverse primer | TGT TGT GGC GGA TCT TGA A                  |
| Probe          | 5HEX/AGCAGAAGA/ZEN/ACGGCATCAAGGTGA/3IABkFQ |

<sup>a</sup> Obtained from Integrated DNA Technologies (Coralville, IA).

**Table S4** Dilution series for pcDNA3-EGFP and corresponding Cq values

| Standard | [EGFP] (ng/ $\mu$ L) | log[EGFP] | Cq (average) <sup>a</sup> |
|----------|----------------------|-----------|---------------------------|
| 1        | 0.00025              | -3.6021   | 24.9400                   |
| 2        | 0.0025               | -2.6021   | 22.3100                   |
| 3        | 0.025                | -1.6021   | 18.5000                   |
| 4        | 0.25                 | -0.6021   | 16.2500                   |
| 5        | 25                   | 1.3979    | 11.1500                   |

<sup>a</sup> Obtained from two measurements ( $n = 2$ ).

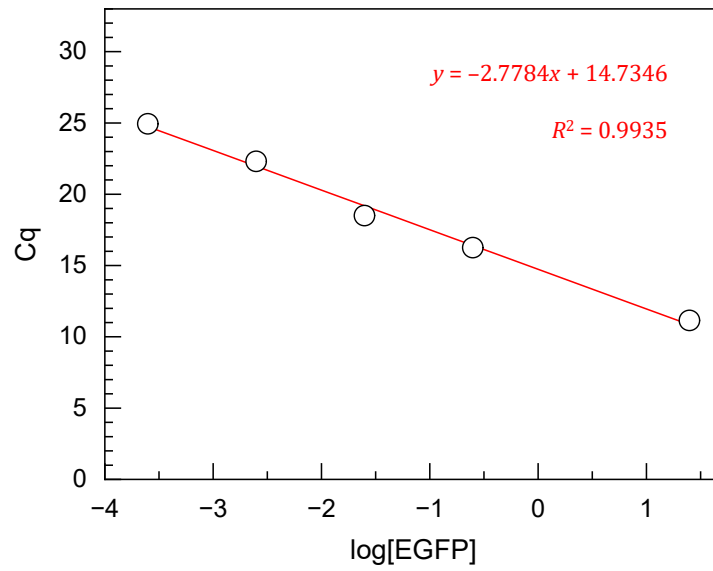

**Fig. S5** Standard curve used for quantification of EGFP. The line represents a linear fit of the data set.

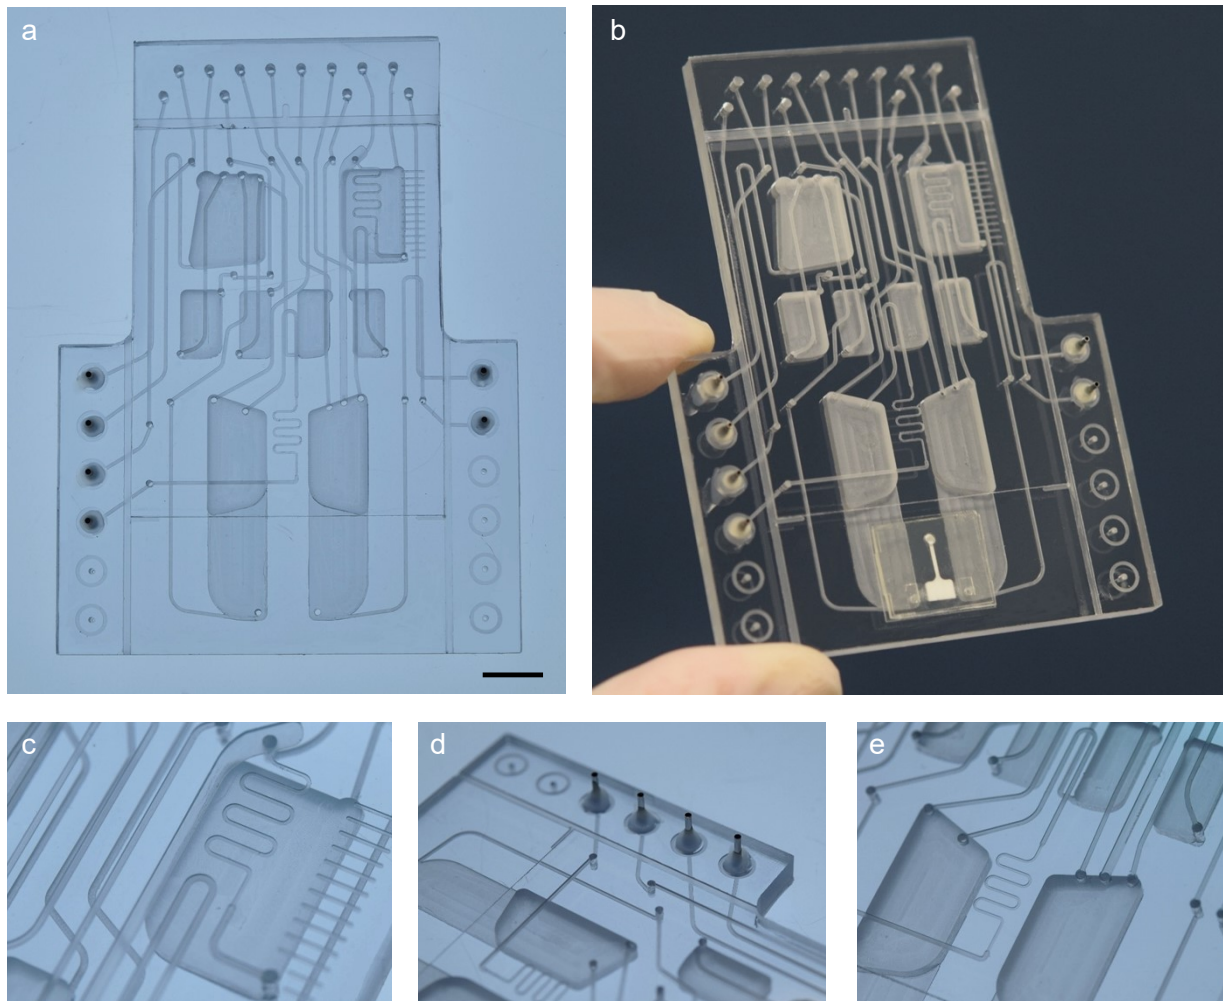

**Fig. S6** Microfluidic cartridge. (a) Photograph (top view) after reservoirs have been sealed on the top and bottom of the machined PC part. Connectors were inserted into the respective ports on the left- and right-hand side of the fluidic circuit. Scale bar: 1 cm. (b) Photograph (3D view) of the cartridge with the capture unit put in place. (c–e) Close-up views showing different segments of the microfluidic circuit.

**Table S5** Designation of reservoirs on the microfluidic cartridge

| Reservoir | Buffer (initial stage) | Buffer volume ( $\mu\text{L}$ ) | Dedicated pressure port # |
|-----------|------------------------|---------------------------------|---------------------------|
| R1        | n.a.                   | –                               | 2                         |
| R2        | EqB                    | 200                             | 8                         |
| R3        | DB                     | 190                             | 10                        |
| R4        | NB                     | 10                              | 3                         |
| R5        | EqB                    | 100                             | 4                         |
| R6        | EB                     | 100                             | 6                         |
| R7        | n.a.                   | –                               | 5                         |
| R8        | n.a.                   | –                               | 7                         |

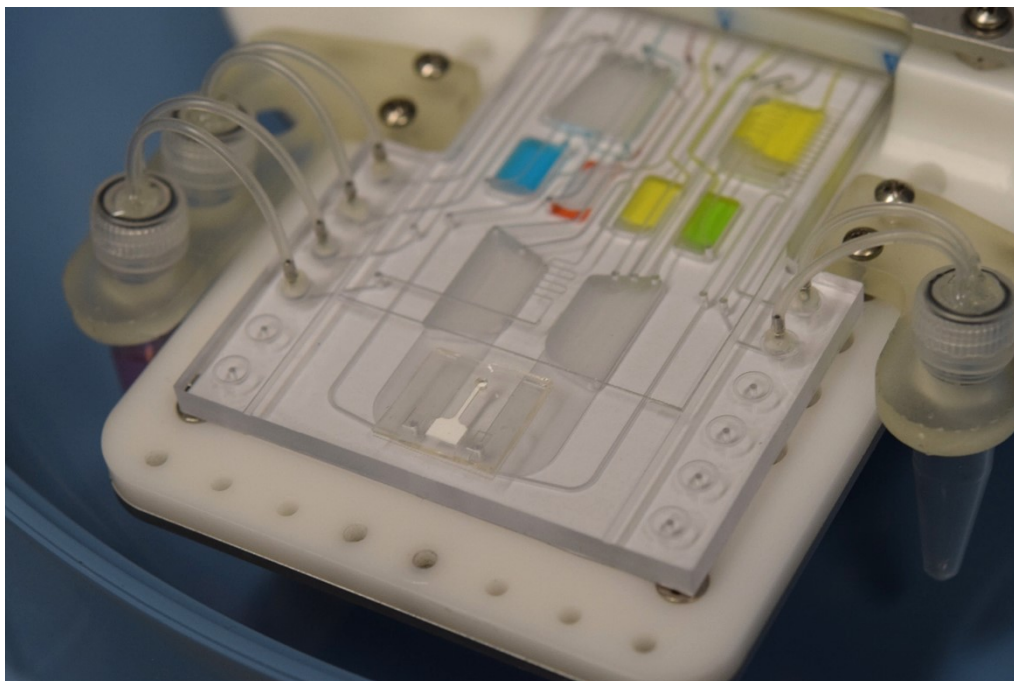

**Fig. S7** Microfluidic cartridge on the rotating stage. Pressure ports (located on the upper portion of the cartridge) are sealed by the manifold lid (for which the vertical position can be adjusted manually). External vials are held in place using 3D-printed support structures. Colored solutions were inserted into reservoirs for demonstration purposes. Liquid remaining in channels used in the filling process will be pushed down into the respective reservoirs once the platform starts rotating.

**Table S6** External vials used in the on-chip AAV purification process

| Vial | Purpose                     | Connecting ports | Function                         |
|------|-----------------------------|------------------|----------------------------------|
| 1    | Collect purified AAV sample | A1               | Application of negative pressure |
|      |                             | A2               | Liquid transfer from R1          |
| 2    | Provide crude lysate        | A3               | Application of positive pressure |
|      |                             | A4               | Liquid transfer to R7            |
| 3    | Collect waste               | B1               | Application of negative pressure |
|      |                             | B2               | Liquid transfer from R8          |

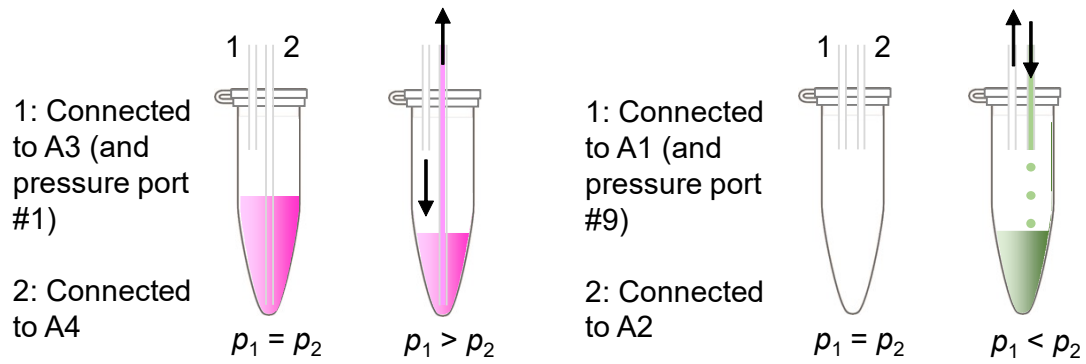

**Fig. S8** Liquid transfer to and from external vials. The left-hand panel illustrates connectivity for vial 2 containing crude lysate. Tubing (1) is cut short while tubing (2) extends to the bottom of the vial. When the tube is pressurized (by applying positive pressure to port #1), liquid is pushed up in tubing (2) and so can be transferred to R7 on the cartridge. The right-hand panel depicts connectivity for vial 1 destined to collect the purified sample. Tubing (1) and (2) are both trimmed. Applying negative pressure to port #9 causes liquid to be aspirated into the exit channel connected to reservoir R1 and further into the vial.

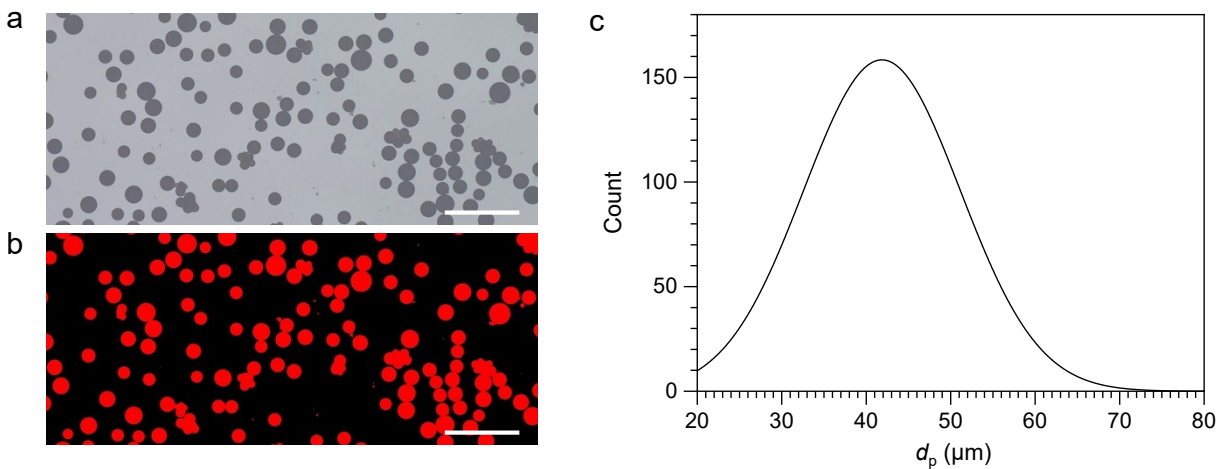

**Fig. S9** Assessment of particle size distribution for POROS™ CaptureSelect™ AAVX Affinity Resin. (a) Optical micrograph of diluted bead slurry. (b) Binary image used for particle analysis. Scale bars: 200  $\mu\text{m}$ . (c) Plot of the particle size distribution derived from the experimental data set ( $n = 736$ ). The mean value has been calculated as  $d_p = 41.9 \pm 9.3 \mu\text{m}$ .

**Table S7** Assessment of pcDNA3-EGFP removal for on-chip sample purification

| Sample | Cq (average) <sup>a</sup> | log[EGFP] | [EGFP] (ng/ $\mu$ L)  | Removal (%) |
|--------|---------------------------|-----------|-----------------------|-------------|
| A      | 29.67                     | -5.3753   | $4.21 \times 10^{-6}$ | 99.993      |
| B      | 29.71                     | -5.3897   | $4.08 \times 10^{-6}$ | 99.993      |
| C      | 30.98                     | -5.8468   | $1.42 \times 10^{-6}$ | 99.998      |

<sup>a</sup> Obtained from two measurements ( $n = 2$ ).
